# Supplementary material
Source: MDPI journal article supplement (https://www.mdpi.com/2079-3197/7/4/64)

# Mesp test on electron density isosurface of 0.001 au

Rafael López, Frank Martínez, I. Ema, J.M. García de la Vega and G. Ramírez

November 8, 2019

## Details on computation of electron density

**Molecule:** Catechin

**Number of atoms:** 35

**Type of calculation:** MP2

**LCAO program:** NwChem

**Basis set:** DZP (Dunning)

**Number of basis functions:** 385

**Results in convergence:**

```
-----  
SCF energy                -1025.506542418239  
Correlation energy        -3.373250480378  
Singlet pairs             -2.099306813488  
Triplet pairs             -1.273943666890  
Total MP2 energy          -1028.879792898617  
-----
```

This calculation has been kindly supplied to us by Dr. Noel Ferro.

## Details on DAM computation of electron density (MED) and electrostatic potential (MESP)

**Length of DAM partition/exansion of MED:**  $l_{max} = 10$

**Grid size for MED tabulation:** 257x257x257 (16 974 593 points)

**Grid dimensions for MED tabulation:**  $x, y, z \in [-17, 17]$  bohr

**MED value for isosurface:** 0.001

**Number of triangles for MED isosurface:** 179 852

**Number of vertices for MED isosurface:** 90 656

**Wall-clock time of MED grid computation:** 475 sec (in a system with an Intel(R) Core(TM) i7-2630QM CPU @ 2.00GHz and 4 cores)

## Results of MESP surface extrema computed with the current algorithm

Number of local maxima (higher than mesp = 0.73E-01) found = 5

Positions and mesp values of the local maxima in the mesh

```
-----  
x = -0.10090E+02 y = 0.37188E+01 z = -0.79681E+00 mesp = 0.89468E-01  
x = -0.29761E+00 y = 0.12883E+02 z = -0.39838E+00 mesp = 0.91452E-01  
x = 0.51798E+01 y = -0.12575E+02 z = -0.53119E+00 mesp = 0.80414E-01  
x = 0.82345E+01 y = 0.29219E+01 z = 0.13712E+01 mesp = 0.78107E-01  
x = -0.46484E+01 y = -0.54453E+01 z = 0.45670E+01 mesp = 0.78653E-01
```

Number of local minima (lower than mesp = -0.65E-01) found = 1

Positions and mesp values of the local minima in the mesh

```
-----  
x = -0.79681E+00 y = -0.11578E+02 z = 0.37188E+01 mesp = -0.80831E-01
```

\*\*\*\*\* MESP statistics \*\*\*\*\*

Total surface with positive MESP = 0.49282E+03

Total surface with negative MESP = 0.58480E+03

MESP average = 0.73496E-04

Positive MESP average = 0.27731E-01

Negative MESP average = -0.23234E-01

MESP variance = 0.76617E-03

Positive MESP variance = 0.49598E-03

Negative MESP variance = 0.27020E-03

MESP average deviation = 0.25297E-01

MESP nu parameter = 0.22829E+00

TIMING (in seconds)

|                                    |                                          |
|------------------------------------|------------------------------------------|
| Processor 0 (user, system, total): | ( 0.11208E+03, 0.40000E+01, 0.11608E+03) |
| Processor 1 (user, system, total): | ( 0.11345E+03, 0.47552E+00, 0.11393E+03) |
| Processor 2 (user, system, total): | ( 0.11490E+03, 0.18774E+00, 0.11509E+03) |
| Processor 3 (user, system, total): | ( 0.72241E+02, 0.23997E+01, 0.74640E+02) |

## Results of MESP surface extrema computed with eq (36) of main text

Number of local maxima (higher than mesp = 0.73E-01) found = 5

Positions and mesp values of the local maxima in the mesh

```
-----
x = -0.10090E+02 y = 0.37188E+01 z = -0.79681E+00 mesp = 0.89467E-01
x = -0.29761E+00 y = 0.12883E+02 z = -0.39838E+00 mesp = 0.91451E-01
x = 0.51798E+01 y = -0.12575E+02 z = -0.53119E+00 mesp = 0.80413E-01
x = 0.82345E+01 y = 0.29219E+01 z = 0.13712E+01 mesp = 0.78107E-01
x = -0.46484E+01 y = -0.54453E+01 z = 0.45670E+01 mesp = 0.78652E-01
```

Number of local minima (lower than mesp = -0.65E-01) found = 1

Positions and mesp values of the local minima in the mesh

```
-----
x = -0.79681E+00 y = -0.11578E+02 z = 0.37188E+01 mesp = -0.80831E-01
```

\*\*\*\*\* MESP statistics \*\*\*\*\*

Total surface with positive MESP = 0.49282E+03

Total surface with negative MESP = 0.58480E+03

MESP average = 0.73524E-04

Positive MESP average = 0.27731E-01

Negative MESP average = -0.23234E-01

MESP variance = 0.76617E-03

Positive MESP variance = 0.49597E-03

Negative MESP variance = 0.27019E-03

MESP average deviation = 0.25297E-01

MESP nu parameter = 0.22829E+00

TIMING (in seconds)

|                                    |                                          |
|------------------------------------|------------------------------------------|
| Processor 0 (user, system, total): | ( 0.80432E+04, 0.26885E+03, 0.83121E+04) |
| Processor 1 (user, system, total): | ( 0.79180E+04, 0.18680E+01, 0.79199E+04) |
| Processor 2 (user, system, total): | ( 0.83063E+04, 0.19510E+01, 0.83083E+04) |
| Processor 3 (user, system, total): | ( 0.75441E+02, 0.29307E+01, 0.78371E+02) |

## MESP surface extrema on density isosurface (0.001 au)

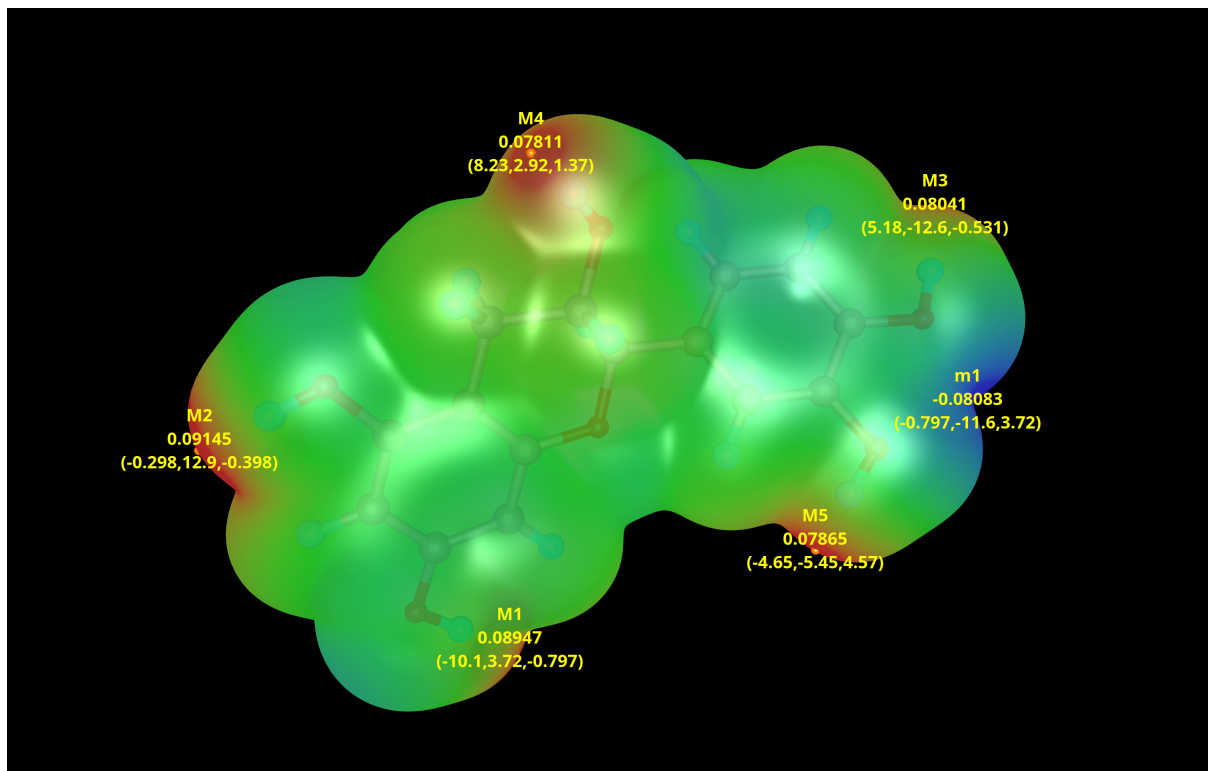

Supplement: s1 [file s1]
